# Supplementary material for: Concentration dependent interfacial chemistry of the NaOH (aq) : gibbsite interface
Source: Royal Society of Chemistry journal article supplement (doi:10.1039/d2cp01997c), 2022-01-01
Supplement: d2cp01997c1.pdf [file d2cp01997c1.pdf]

1  
2  
3  
4  
5  
6  
7  
8  
9  
10  
11  
12  
13  
14

## Supplementary Information

### Concentration Dependent Interfacial Chemistry of the NaOH<sub>(aq)</sub>:Gibbsite Interface

Wei Liu<sup>1\*\*</sup>, Maxime Pouvreau<sup>2\*\*</sup>, Andrew G. Stack<sup>3</sup>, Xiaoning Yang<sup>1\*</sup> and Aurora E. Clark<sup>2\*</sup>

<sup>1</sup>State Key Laboratory of Materials-Oriented Chemical Engineering, College of Chemical Engineering, Nanjing Tech University, Nanjing 211816, P. R. China

<sup>2</sup>Department of Chemistry, Washington State University, Pullman, Washington 99164, United States

<sup>3</sup>Oak Ridge National Laboratory, Oak Ridge, TN 37831, United States

15 **1) Supplementary Information for Computational Methods**

16 **Table S1.** Composition of the bulk aqueous solutions simulated in this work and  
 17 corresponding densities and concentrations (molalities (b) in mol/kg, molarities in  
 18 mol/L, mole fractions(x), density (d) in kg/L) at 300 K and 1 atm.

| N(NaOH) | N(H <sub>2</sub> O) | x(NaOH) | b <sub>NaOH</sub> | d <sub>exp.</sub> | d <sub>MD</sub> | [NaOH] <sub>exp</sub> | [NaOH] <sub>FF</sub> |
|---------|---------------------|---------|-------------------|-------------------|-----------------|-----------------------|----------------------|
| 23      | 2520                | 0.0091  | 0.507             | 1.019             | 1.023           | 0.50                  | 0.50                 |
| 45      | 2510                | 0.0179  | 0.995             | 1.039             | 1.054           | 1.00                  | 1.01                 |
| 90      | 2490                | 0.0361  | 2.006             | 1.077             | 1.098           | 2.00                  | 2.04                 |
| 226     | 2470                | 0.0915  | 5.079             | 1.180             | 1.182           | 5.00                  | 5.01                 |
| 454     | 2330                | 0.1948  | 10.816            | 1.325             | 1.338           | 10.00                 | 10.10                |

19

20

21 **2) Supplementary Information for Results and Discussion**

22 **Figure S1.** Number density profiles of water O (solid) and H (dashed). The vertical dashed  
23 lines indicate the boundaries between the first water layer and the second water layer (3.9 Å),  
24 and between the second water layer and the rest of the solution (6.6 Å)

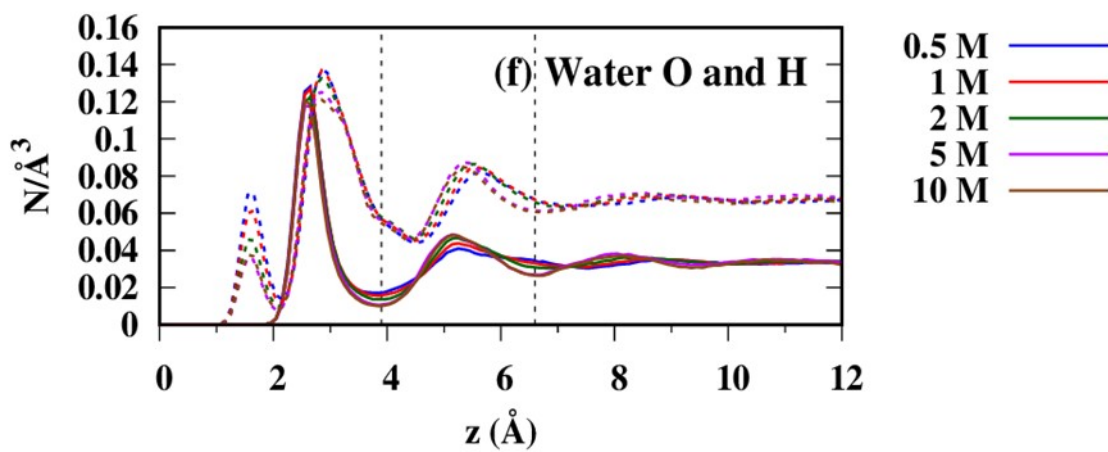

25

26

27

28

29

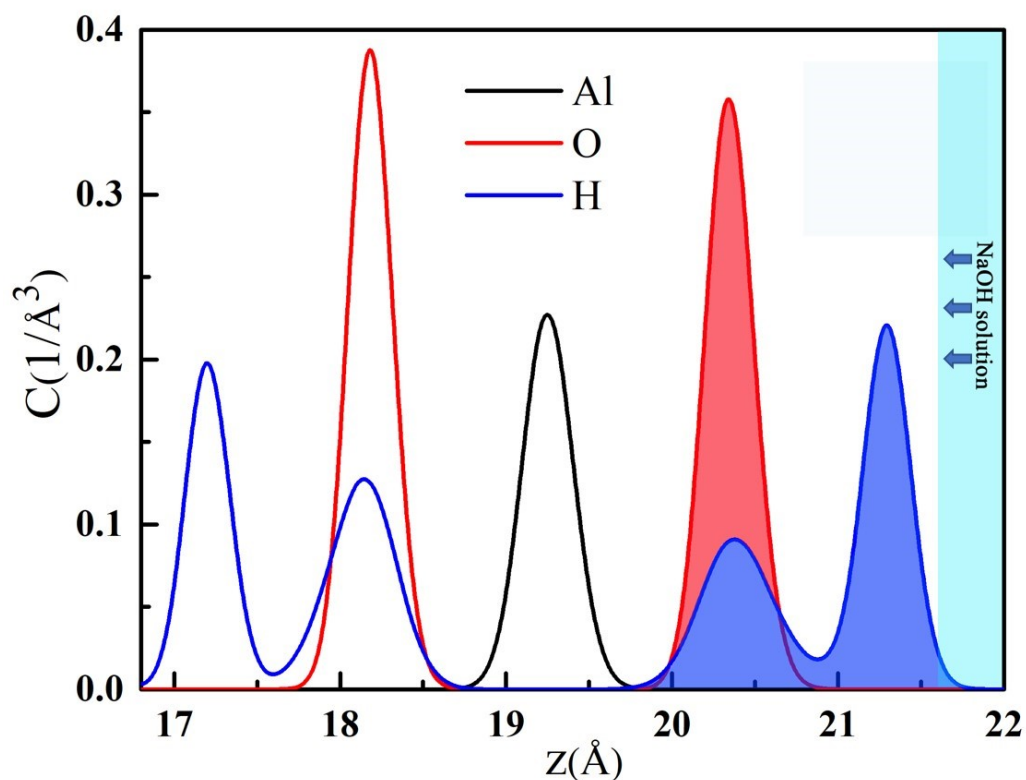

30 **Figure S2.** Density profile of one of the two outermost layers of the gibbsite slab. The  
31 distribution of the  $z$  coordinate of the outermost O and H atoms are shaded.

32

33 As shown in Figure S2, we can clearly see that there are two orientations for the  
34 surface hydroxyl groups. They are either roughly parallel to the surface (where the O  
35 and H distributions overlap at  $z \sim 20.4$  Å) or out of the plane formed by the surface ( $z(\text{H})$   
36 distribution centered at  $z \sim 21.3$  Å). Integration of the first and second  $z(\text{H})$  distributions  
37 at and  $z = 21.3$  Å indicates 58% of the hydroxyl groups are oriented out of the basal plane  
38 i.e. point towards the solution (42% are parallel to the plane).

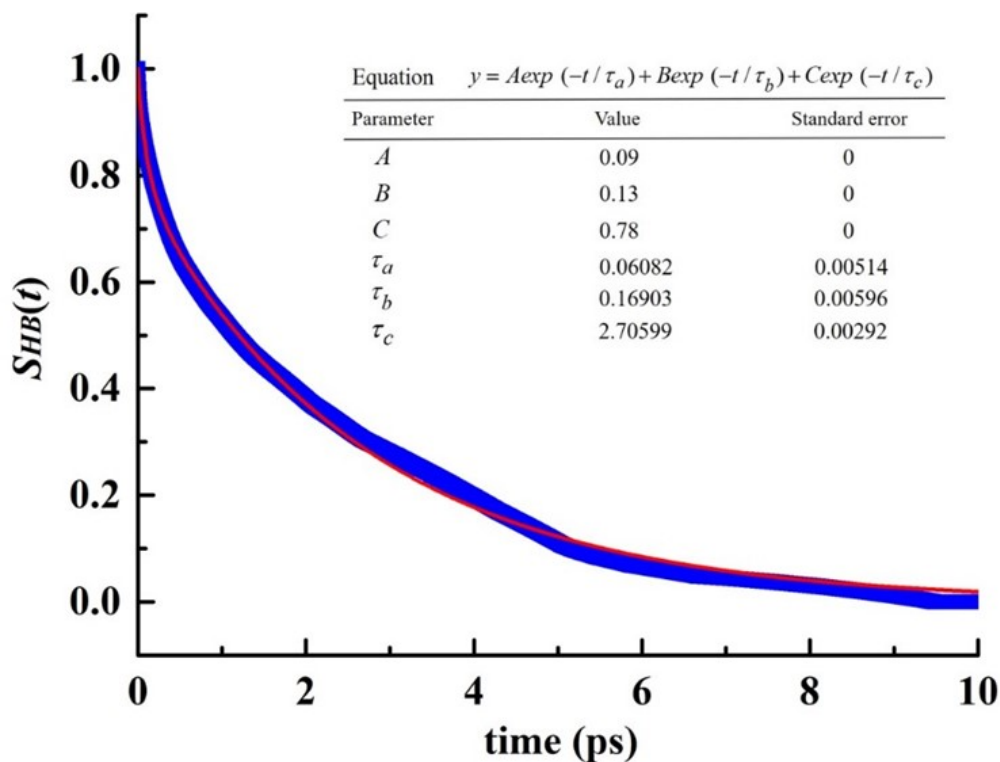

39

40 **Figure S3.** The comparison of the simulated  $S_{HB}(t)$  of the OH<sup>-</sup>-surface HBs with the  
 41 model obtained from a fit for the 0.5 M NaOH solution system

42 To determine the HB lifetimes ( $\tau_s^{HB}$ ), the  $S_{HB}(t)$  curves have been fitted by three  
 43 weighed exponentials (with a total weight of unity, *i.e.*,  $A + B + C = 1$ ), which is  
 44 expressed as

$$S_{HB}(t) = Aexp(-t/\tau_a) + Bexp(-t/\tau_b) + Cexp(-t/\tau_c)$$

45 where  $A$ ,  $B$ , and  $C$  are tunable parameters, while  $\tau_a$ ,  $\tau_b$ , and  $\tau_c$  are the characteristic  
 46 time constants. All the fitted parameters are listed in Table 2 and a typical fitting result  
 47 is given in Figure S4. According to the fitted parameters, the HB lifetime  $\tau_s^{HB}$  can be  
 48 calculated as,  $\tau_s^{HB} = A\tau_a + B\tau_b + C\tau_c$ . All calculated  $\tau_s^{HB}$  values are listed in Tables S2  
 49 and S3.

50

51 **Table S2.** The fitting parameters and the average lifetime  $\tau_s^{HB}$  of water-surface  
 52 hydrogen bonds

| $S_{HB}(t)$ | $A$  | $B$  | $C$  | $\tau_a$ | $\tau_b$ | $\tau_c$ | $\tau_s^{HB}(\text{ps})$ |
|-------------|------|------|------|----------|----------|----------|--------------------------|
| 0.5 M       | 0.55 | 0.36 | 0.09 | 0.64     | 0.06     | 3.51     | 0.66                     |
| 1 M         | 0.54 | 0.34 | 0.12 | 0.80     | 0.07     | 3.44     | 0.86                     |
| 2 M         | 0.32 | 0.49 | 0.19 | 0.06     | 0.68     | 3.01     | 0.92                     |
| 5 M         | 0.45 | 0.27 | 0.28 | 1.01     | 0.07     | 6.18     | 2.20                     |
| 10 M        | 0.43 | 0.33 | 0.24 | 0.77     | 0.07     | 6.33     | 1.87                     |

53

55 **Table S3** · The fitting parameters and the average lifetime  $\tau_S^{HB}$  of OH<sup>-</sup>-surface

56 hydrogen bonds

| $S_{HB}(t)$ | $A$  | $B$  | $C$  | $\tau_a$ | $\tau_b$ | $\tau_c$ | $\tau_S^{HB}$ (ps) |
|-------------|------|------|------|----------|----------|----------|--------------------|
| 0.5 M       | 0.09 | 0.13 | 0.78 | 0.06     | 0.17     | 2.71     | 2.14               |
| 1 M         | 0.15 | 0.15 | 0.70 | 1.80     | 0.13     | 18.74    | 13.41              |
| 2 M         | 0.25 | 0.13 | 0.62 | 1.02     | 0.08     | 19.74    | 12.50              |
| 5 M         | 0.21 | 0.08 | 0.71 | 1.04     | 0.04     | 28.61    | 20.53              |
| 10 M        | 0.22 | 0.08 | 0.70 | 0.94     | 0.03     | 26.85    | 19.01              |

57

58

59 **Surface Charge Caused by Adsorption.** Figure S4a presents the interfacial

60 charge density distributions, which include the Na<sup>+</sup>, OH<sup>-</sup> ions and the water molecules

61 on the gibbsite surface. We further calculated the interfacial electrostatic potential of

62 gibbsite/water due to NaOH adsorption. The electrostatic potential  $\Psi(z)$  is related to

63 the interfacial charge density  $\rho(z)$  via the Poisson equation<sup>55</sup>:

$$64 \quad \frac{d^2\Psi(z)}{dz^2} = -\frac{\rho(z)}{\epsilon_0} \quad (1)$$

65 where  $\epsilon_0 = 8.85 \times 10^{-12}$  C/m·V is the vacuum dielectric permittivity. Herein, the

66 electrostatic potential is computed by integrating Equation (3) twice. Figure 9b shows

67 the simulated  $\Psi(z)$  near the gibbsite surface along the  $z$  axis. The positive charge

68 density for  $z < 2.4$  Å corresponds to the Na<sup>+</sup> of the IS layer and H<sub>w</sub>, while the negative

69 charge density and electrostatic potential for  $2.4$  Å  $< z < 3.3$  Å is due to the adsorbed

70 OH<sup>-</sup> ions and O<sub>w</sub>. With an increase in the NaOH concentrations, the interfacial charge

71 density below  $3.2$  Å becomes more asymmetric, with an increase in the negative charge

72 density for  $2.4$  Å  $< z < 3.3$  Å compared to the relatively constant positive charge density

73 across the concentration range in the first area ( $z < 2.4 \text{ \AA}$ ). This is due to the increase in

74 the ratio between the IS  $\text{OH}^-$  and the IS  $\text{Na}^+$  (Figure 5).

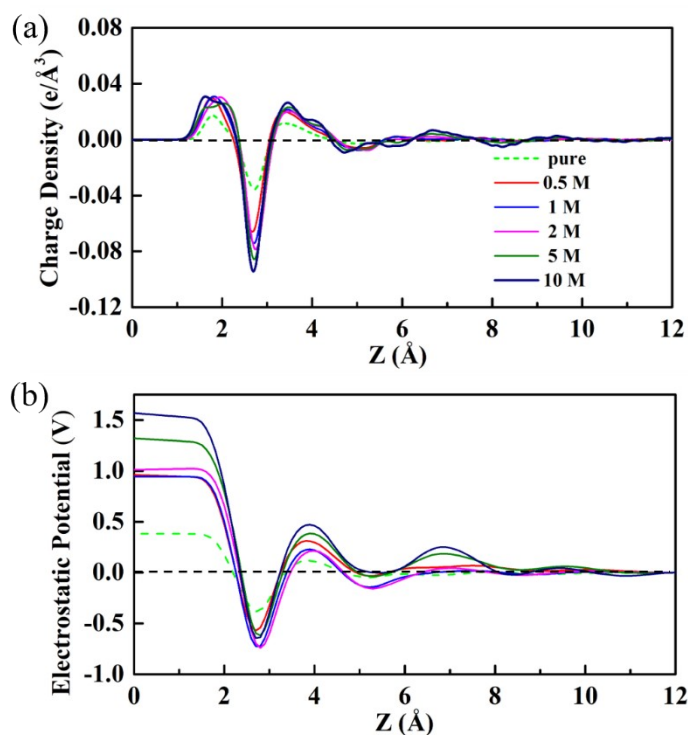

75

76 **Figure S4.** (a) Interfacial charge density profiles due to the adsorption of NaOH and

77 water as a function of distance from the gibbsite surface at different NaOH

78 concentrations. (b) Simulated electrostatic potential as a function of distance from the

79 gibbsite surface.

80

81

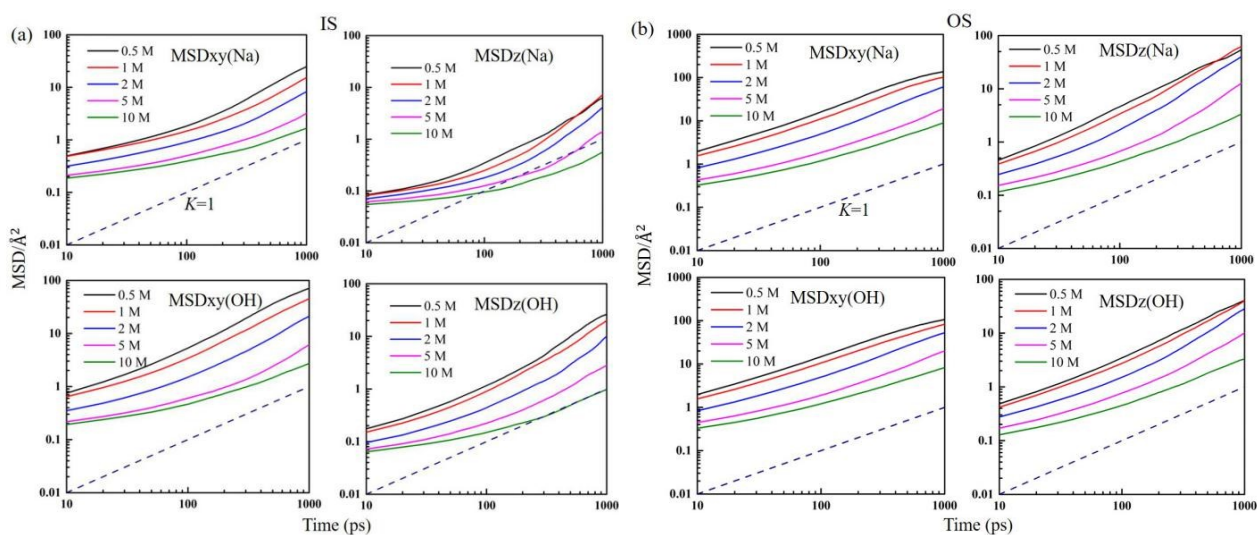



82 **Figure S5.** *MSDs* in log–log scale for ions in the interface region (IS(a) and OS(b)) in  
83 all concentrations.

84

85

87 **Table S4.** The self-diffusion coefficients ( $10^5 \cdot D_s/\text{cm}^2 \cdot \text{s}^{-1}$ ) of  $\text{Na}^+$  and  $\text{OH}^-$  in IS

| concentration | ion | IS-xy  | IS-z   | OS-xy | OS-z  |
|---------------|-----|--------|--------|-------|-------|
| 0.5 M         | Na  | 0.074  | 0.046  | 0.22  | 0.31  |
|               | OH  | 0.16   | 0.15   | 0.18  | 0.19  |
| 1 M           | Na  | 0.048  | 0.058  | 0.19  | 0.41  |
|               | OH  | 0.12   | 0.14   | 0.17  | 0.25  |
| 2 M           | Na  | 0.025  | 0.034  | 0.16  | 0.26  |
|               | OH  | 0.063  | 0.086  | 0.13  | 0.19  |
| 5 M           | Na  | 0.0092 | 0.0098 | 0.056 | 0.091 |
|               | OH  | 0.021  | 0.016  | 0.055 | 0.065 |
| 10 M          | Na  | 0.0035 | 0.0034 | 0.022 | 0.017 |
|               | OH  | 0.0061 | 0.0047 | 0.015 | 0.019 |

88 and OS

89
